# Supplementary material
Source: ML conference proceedings conference paper supplement (https://aclanthology.org/2024.lrec-main.1509)
Supplement: OptionalSupplementaryMaterial [file 2024.lrec-main.1509.OptionalSupplementaryMaterial.zip]

## A. Ethical Statements

### A.1. Fair Use

We strictly followed the criteria of Fair Use by The U.S. Copyright Office<sup>17</sup>, which also applies to YouTube platform. Section 107 of the Copyright Act provides the statutory framework for determining whether something is a fair use and identifies certain types of uses—such as criticism, comment, news reporting, teaching, scholarship, and research—as examples of activities that may qualify as fair use. Section 107 calls for consideration of the following four factors in evaluating a question of fair use:

- **(1) Purpose and character of the use, including whether the use is of a commercial nature or is for nonprofit educational purposes:** Courts look at how the party claiming fair use is using the copyrighted work, and are more likely to find that nonprofit educational and noncommercial uses are fair. Additionally, “transformative” uses are more likely to be considered fair. Transformative uses are those that add something new, with a further purpose or different character, and do not substitute for the original use of the work.
- **(2) Nature of the copyrighted work:** This factor analyzes the degree to which the work that was used relates to copyright’s purpose of encouraging creative expression. Thus, using a more creative or imaginative work (such as a novel, movie, or song) is less likely to support a claim of a fair use than using a factual work (such as a technical article or news item). In addition, use of an unpublished work is less likely to be considered fair.
- **(3) Amount and substantiality of the portion used in relation to the copyrighted work as a whole:** Under this factor, courts look at both the quantity and quality of the copyrighted material that was used. That said, some courts have found use of an entire work to be fair under certain circumstances. And in other contexts, using even a small amount of a copyrighted work was determined not to be fair because the selection was an important part—or the “heart”—of the work.
- **(4) Effect of the use upon the potential market for or value of the copyrighted work:** Here, courts review whether, and to what extent, the unlicensed use harms the existing or future market for the copyright owner’s original work.

<sup>17</sup><https://www.copyright.gov/fair-use/>

According to the law, we assert our defense under the Fair Use doctrine with the help of Fair Use explanation<sup>18</sup> by copyrightalliance.org and ELRC Report on legal issues in web crawling<sup>19</sup> by Pawel Kamocki as follows:

- (1) Obviously we crawled the data and published only for non-commercial and research purposes.
- (1) We did not directly use videos crawled from YouTube. Instead, we transformed them into audio files with a predefined sampling rate. Additionally, we divided lengthy audio files, approximately one hour in duration, into shorter segments lasting between 10 to 30 seconds. These segments were then randomly shuffled, making it impossible for users to piece them together to comprehend the entirety of the originally crawled videos. Therefore, our work is transformative and we do not substitute the original use of the crawled videos.
- (2) Our medical conversations are factual (non-fiction) and hence qualified as fair.
- (2) Videos on YouTube platform are universally accessible around the world, therefore we satisfy the criteria for the copyrighted work’s publication status.
- (3) There is no quantitative test to evaluate whether a given use is fair. The randomly shuffled 10-30 second segments we have created do not provide the complete context and meaning of each video, thus making them incapable of representing the “heart” of the copyrighted work.
- (4) We don’t utilize our publicly available data to compete with the copyright owners’ business. Furthermore, our 10-30 second segments have no impact on the viewership count on YouTube. As a result, our efforts do not undermine the potential market being pursued by the copyright owners.

Besides our work, several similar works exist that involve the extraction of YouTube videos and their conversion into audio files for research and non-commercial intentions, such as GigaSpeech<sup>20</sup> (China & USA), VoxCeleb<sup>21</sup> (UK), VoxLingua107<sup>22</sup> (UK).

<sup>18</sup><https://copyrightalliance.org/faqs/what-is-fair-use/>

<sup>19</sup>[http://www.elra.info/media/filer\\_public/2021/02/12/elrc-legal-analysis-webcrawling\\_report-v11.pdf](http://www.elra.info/media/filer_public/2021/02/12/elrc-legal-analysis-webcrawling_report-v11.pdf)

<sup>20</sup><https://github.com/SpeechColab/GigaSpeech>

<sup>21</sup><https://www.robots.ox.ac.uk/vgg/data/voxceleb/>

<sup>22</sup><https://bark.phon.ioc.ee/voxlangua107/>

## A.2. Data Consent

According to the existing law on the data consent, we are allowed to publish research data. We describe in short as follows:

- First of all, 137/194 countries signed Data Protection and Privacy Legislation Worldwide<sup>23</sup> by the United Nations, including USA, EU, Germany, Vietnam. So Vietnamese law on data protection complies with international law, as Article 6 of the Personal Data Protection Act by the Vietnamese government says: “The protection of personal data is carried out in accordance with international treaties to which the Socialist Republic of Vietnam is a member”.
- Researchers have the right to freely publish sensitive medical data for research without the consent of the data subject (speakers in speech data), as Article 20, Section 4 says: “The party processing personal data is not required to register for processing sensitive personal data in the case of research purposes.”
- Once more, researchers do not need direct or indirect consent from the data subject to publish research papers, as the Article 16 says: “Data deletion will not apply at the request of the data subject in the following cases: Personal data is processed to serve legal requirements, scientific research, and statistics.”
- Again, researchers do not need consent, as Article 9 of the European General Data Protection Regulation (GDPR) permits researchers in Member States to publish personal data for scientific research purposes without consent.
- Researchers are strongly encouraged to publish research on sensitive medical data, according to Law on Medical Examination and Treatment, Constitution of the Socialist Republic of Vietnam, Article 22: “Practitioners (...) are responsible for updating relevant medical knowledge (...) including (...) c) Publish scientific research (...)”.
- In case of unexpected issues during publishing research, researchers are “Protected by the law and not responsible when a medical incident still occurs after complying with regulations.”, as stated in Article 42.
- We crawled generated-by-Vietnam data using Vietnamese IP address and a crawler from

a Vietnamese company authorized by Vietnamese government, and the right to publish this data for research purposes is protected under Vietnamese Law (shown above), since Google (Youtube) must comply with Vietnamese law on content in Vietnamese cyberspace, as shown in Article 26, Cybersecurity Law, Constitution of the Socialist Republic of Vietnam: “Domestic and foreign enterprises providing services on telecommunications networks, the Internet, and value-added services in cyberspace in Vietnam have activities of collecting, exploiting, analyzing, and processing information data (...) created by service users in Vietnam must store this data in Vietnam (...) as prescribed by the Government.”

- International researchers have the right to publish and process Vietnamese personal data without consent. Also they are both encouraged to publish Vietnamese research data and are protected under Vietnamese law because they must comply with Vietnamese law on generated-by-Vietnam data, according to Article 2 and 10, the Vietnamese Civil Code on Civil Relations with Foreign Elements: “The provisions of Vietnamese civil law apply to civil relations involving foreign elements (...). In case the application or consequences of the application of foreign law are contrary to (...) the Vietnam Civil Code and other basic principles of Vietnamese law, then Vietnamese law applies.”

The YouTube content in our dataset is about medical shows, interviews, lectures, etc., where all participants talked to camera and were aware that the videos are publicly accessible in an attempt to provide medical knowledge to YouTube users. These videos are published by national TV channels, not by some amateur content creators. There are some YouTube videos that speakers are not aware of being recorded, published by amateurs, but we did not include them in our dataset.

## B. Additional Details of *VietMed* Dataset

### B.1. Description of ICD-10 Codes

Table 7 shows the detailed description of ICD-10 codes. The audio files in our dataset are classified based on these ICD-10 codes.

### B.2. Real Distribution of Accents in Vietnam

Table B.2 shows the real distribution of accents in Vietnam, which our *VietMed* dataset follows.

<sup>23</sup><https://unctad.org/page/data-protection-and-privacy-legislation-worldwide>

| ICD-10 Code | Description of diseases                                                                             |
|-------------|-----------------------------------------------------------------------------------------------------|
| A00-B99     | Certain infectious and parasitic diseases                                                           |
| C00-D49     | Neoplasms                                                                                           |
| D50-D89     | Diseases of the blood and blood-forming organs and certain disorders involving the immune mechanism |
| E00-E89     | Endocrine, nutritional and metabolic diseases                                                       |
| F01-F99     | Mental, Behavioral and Neurodevelopmental disorders                                                 |
| G00-G99     | Diseases of the nervous system                                                                      |
| H00-H59     | Diseases of the eye and adnexa                                                                      |
| H60-H95     | Diseases of the ear and mastoid process                                                             |
| I00-I99     | Diseases of the circulatory system                                                                  |
| J00-J99     | Diseases of the respiratory system                                                                  |
| K00-K95     | Diseases of the digestive system                                                                    |
| L00-L99     | Diseases of the skin and subcutaneous tissue                                                        |
| M00-M99     | Diseases of the musculoskeletal system and connective tissue                                        |
| N00-N99     | Diseases of the genitourinary system                                                                |
| O00-O9A     | Pregnancy, childbirth and the puerperium                                                            |
| P00-P96     | Certain conditions originating in the perinatal period                                              |
| Q00-Q99     | Congenital malformations, deformations and chromosomal abnormalities                                |
| R00-R99     | Symptoms, signs and abnormal clinical and laboratory findings, not elsewhere classified             |
| S00-T88     | Injury, poisoning and certain other consequences of external causes                                 |
| U00-U85     | Codes for special purposes                                                                          |
| V00-Y99     | External causes of morbidity                                                                        |
| Z00-Z99     | Factors influencing health status and contact with health services                                  |

Table 7: Description of ICD-10 codes which our dataset follows, according to the 2024 version by World Health Organization. Each ICD-10 Code, e.g. A00-B99, could be in smaller codes partitioned. However, in our dataset we only used 22 ICD-10 Codes since partitioning into smaller codes makes the annotation too complicated and unnecessary.

| Region  | Subregion           | Typical Provinces                  | Population |
|---------|---------------------|------------------------------------|------------|
| North   | Northeast           | Cao Bằng<br>Hà Giang<br>...        | 8M         |
|         | Northwest           | Điện Biên<br>Hòa Bình<br>...       | 4M         |
|         | Red River Delta     | Hà Nội<br>Hải Phòng<br>...         | 20M        |
| Central | North Central Coast | Hà Tĩnh<br>Nghệ An<br>...          | 10M        |
|         | South Central Coast | Đà Nẵng<br>Bình Thuận<br>...       | 9M         |
|         | Central Highland    | Gia Lai<br>Kon Tum<br>...          | 5M         |
| South   | Southeast           | TP. Hồ Chí Minh<br>Đồng Nai<br>... | 16M        |
|         | Southwest           | Long An<br>Cần Thơ<br>...          | 18M        |

Table 8: Real distribution of Vietnamese accents. The statistics was retrieved in 2015 from Vietnamese General Statistics Office. In our dataset, we did not split the North accent into subregional accents since it was too difficult for our annotators to correctly recognize subregional accents of the North region.

### B.3. Concerns about Noisy Speech in *VietMed*

Real-world speech data should contain real-world acoustic conditions (e.g. background noises, music, etc.). To enhance the quality of a speech dataset, especially for a read speech dataset, people often use a Signal-to-Noise Ratio (SNR) to measure the background noises and discard segments with a high level of SNR. However, using an SNR threshold to obtain only good speech signals, discarding noisy segments, would violate real-world scenarios, making our *VietMed* dataset no longer real world but rather "simulated".

Actually, we only removed audio segments that have no speech. We still kept overlapped speech segments, as long as the main speaker's speech is still comprehensible. The quality assurance for real-world ASR datasets should focus on transcription, which we have already addressed in the paper, instead of focusing on the quality of the speech signal.

### B.4. Extra Data Statistics for Labeled Medical Data *VietMed-L*

Table 9 shows the statistics of 3 train-dev-test subsets in *VietMed-L*. We split these 3 subsets in a way that made *VietMed-Train* the least generalizability by having the least number of speakers, recording conditions, accents and roles, while prioritizing *VietMed-Dev* and *VietMed-Test* more generalizability. Note that no speaker overlap occurred in the 3 subsets.

### B.5. Extra Data Statistics for Unlabeled Medical Data *VietMed-U*

Figure 2 shows the distribution of ICD-10 code and Figure 3 shows the distribution of accents in *VietMed-U*. We collected *VietMed-U* in a manner similar to *VietMed-L*, assuring a comparable generalizability as in *VietMed-L*.

## C. ASR Error Analysis

### C.1. Error Analysis of Pre-trained Model

Table 10 shows the error analysis of our pre-trained model *XLSR-53* on the *VietMed-Test* set.

Table 11 shows the error analysis of our pre-trained model *w2v2-Viet* on the *VietMed-Test* set.

Table 12 shows the error analysis of our best pre-trained model *XLSR-53-Viet* on the *VietMed-Test* set.

### C.2. Error Analysis of Confusion Pairs

Table 13 shows the statistics of confusion pairs in *VietMed-Test* using the best pre-trained model *XLSR-53-Viet*. Closely similar words could lead to

the decreased accuracy of an ASR system. Therefore, collecting confusion pairs which the ASR system often misrecognized gives researchers an opportunity to analyze common ASR errors and improve the ASR accuracy.

As shown in the table, words that are parts of medical terms and fillers contribute greatly to the decreased accuracy of the ASR system using the pre-trained model *XLSR-53-Viet*. This difficulty was confirmed by our annotators during the dataset annotation, since it was very hard to correctly transcribe medical terms and fillers in real-world medical conversations.

### C.3. Error Analysis of OOV

Table 14 shows the list of OOVs loan words found in *VietMed-Train*. In this table, we used the BABEL project's seed lexicon and automatically augmented it with *VietMed-Train*. We used the toolkit Sequitur Grapheme-To-Phoneme<sup>24</sup> (Bisani and Ney, 2008) - the conversion tool on these pronunciation lexica, to extend the seed lexicon, creating the lexicon for training.

First, we found that the seed lexicon by BABEL was overwhelmed by North and North Central Coast accents, leaving almost no other accents like South Central Coast, Central Highland, Southwest and Southeast. Therefore, this lexicon hurts the accuracy of ASR systems on a generalized dataset like *VietMed*. Second, *VietMed* has a very large number of medical terms, which often come from English loan words. So automatic extension of the seed lexicon without human correction led to wrong phoneme mapping of medical terms, which also hurts the accuracy of ASR systems.

<sup>24</sup><https://github.com/sequitur-g2p/sequitur-g2p>

|              | <i>VietMed-Train</i> | <i>VietMed-Dev</i> | <i>VietMed-Test</i> |
|--------------|----------------------|--------------------|---------------------|
| Dur. [hours] | 5                    | 5                  | 6                   |
| #Speakers    | 13                   | 21                 | 27                  |
| #Words       | 70k                  | 69k                | 76k                 |
| #Rec. cond.  | 2                    | 4                  | 6                   |
| #Accents     | 3                    | 4                  | 5                   |
| #Roles       | 3                    | 4                  | 6                   |

Table 9: Data statistics of *VietMed-L*, retrieved from file "Metadata" in the dataset.

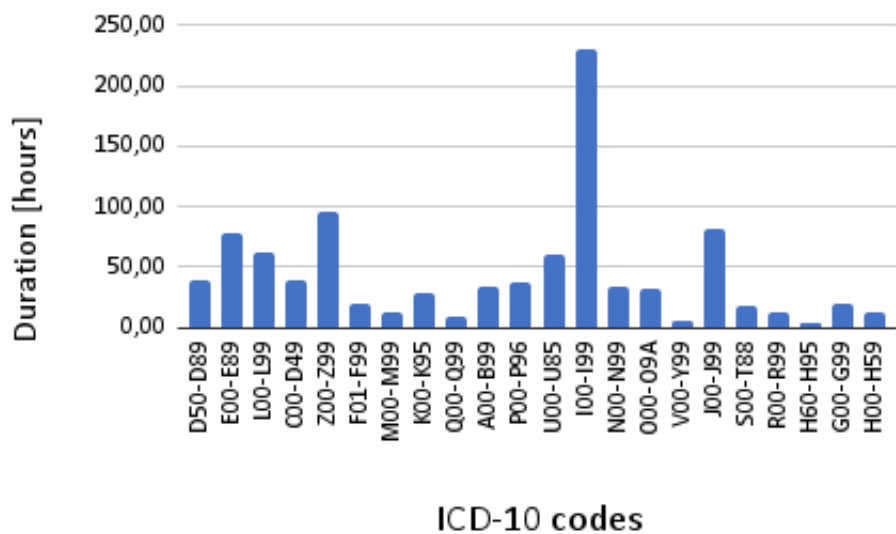

Figure 2: Distribution of ICD-10 code in *VietMed-U*.

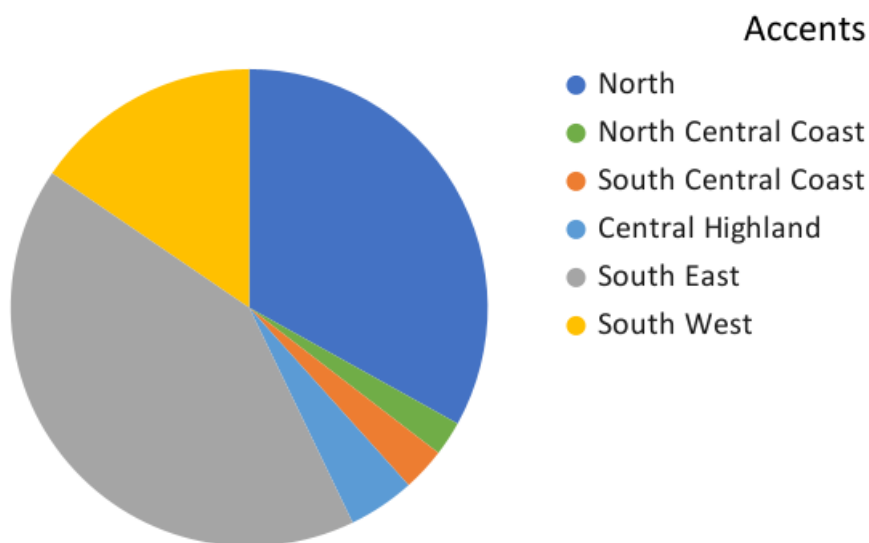

Figure 3: Distribution of accents in *VietMed-U*.

| Speaker ID         | Rec.  | ICD-10  | Role | Gend | Acc. | # Snt | # Wrđ  | Corr | Sub  | Del  | Ins  | Err   | S.Err |
|--------------------|-------|---------|------|------|------|-------|--------|------|------|------|------|-------|-------|
| vietmed_002        | Tel.  | N00-N99 | Lec. | F    | SCC  | 363   | 7631   | 30.7 | 54.4 | 14.9 | 5.6  | 74.9  | 100.0 |
| vietmed_004        |       | M00-M99 | Doc. | M    | SCC  | 446   | 10575  | 51.7 | 34.8 | 13.5 | 6.8  | 55.0  | 100.0 |
| vietmed_014_a      |       | K00-K95 | Host | F    | N    | 18    | 491    | 63.7 | 23.4 | 12.8 | 3.7  | 39.9  | 100.0 |
| vietmed_014_b      |       |         | Doc. | M    | N    | 164   | 4034   | 59.6 | 28.5 | 11.9 | 5.2  | 45.6  | 100.0 |
| vietmed_015_a      |       | O00-O9A | Host | F    | N    | 73    | 1779   | 68.8 | 20.3 | 10.9 | 4.2  | 35.4  | 100.0 |
| vietmed_015_b      |       |         | Doc. | F    | N    | 297   | 5669   | 58.8 | 28.3 | 12.9 | 4.4  | 45.6  | 100.0 |
| vietmed_015_c      |       |         | Pat. | F    | N    | 55    | 1010   | 43.0 | 37.3 | 19.7 | 3.7  | 60.7  | 100.0 |
| vietmed_017_a      | Talk. | U00-U85 | Doc. | F    | SW   | 47    | 1104   | 50.0 | 37.2 | 12.8 | 5.4  | 55.4  | 100.0 |
| vietmed_017_b      |       |         | Doc. | M    | N    | 86    | 2061   | 62.8 | 26.9 | 10.2 | 5.0  | 42.2  | 100.0 |
| vietmed_018_a      |       | K00-K95 | Host | F    | SW   | 63    | 1527   | 54.3 | 32.5 | 13.2 | 19.6 | 65.3  | 100.0 |
| vietmed_018_b      |       |         | Doc. | M    | SW   | 192   | 5293   | 59.8 | 26.2 | 14.0 | 7.2  | 47.4  | 100.0 |
| vietmed_018_c      |       |         | Doc. | F    | SW   | 118   | 2761   | 55.3 | 31.4 | 13.2 | 8.7  | 53.3  | 100.0 |
| vietmed_018_d      |       |         | Pat. | F    | SW   | 20    | 412    | 33.3 | 36.9 | 29.9 | 6.1  | 72.8  | 100.0 |
| vietmed_018_e      |       |         | Pat. | M    | SW   | 5     | 76     | 31.6 | 40.8 | 27.6 | 10.5 | 78.9  | 100.0 |
| vietmed_018_f      |       |         | Doc. | M    | SW   | 25    | 639    | 41.2 | 42.9 | 16.0 | 5.0  | 63.8  | 100.0 |
| vietmed_019_a      |       | L00-L99 | Host | F    | SW   | 58    | 1490   | 55.1 | 31.9 | 13.0 | 6.9  | 51.8  | 100.0 |
| vietmed_019_b      |       |         | Doc. | F    | SW   | 116   | 2776   | 56.5 | 30.5 | 13.0 | 7.7  | 51.3  | 100.0 |
| vietmed_023        | Pod.  | P00-P96 | Pod. | F    | SW   | 390   | 7414   | 55.4 | 35.8 | 8.8  | 4.9  | 49.6  | 99.7  |
| vietmed_024        | Diag. | O00_O99 | Pod. | F    | SE   | 376   | 7425   | 61.2 | 28.8 | 10.0 | 4.7  | 43.5  | 99.7  |
| vietmed_025_a      |       | H60-H95 | Host | F    | SW   | 101   | 2280   | 60.3 | 29.1 | 10.7 | 5.0  | 44.7  | 100.0 |
| vietmed_025_b      | Doc.  |         | M    | SE   | 91   | 1838  | 65.7   | 24.8 | 9.5  | 6.6  | 40.9 | 100.0 |       |
| vietmed_026        | Lec.  | A00-B99 | Lec. | M    | NCC  | 21    | 355    | 31.8 | 47.6 | 20.6 | 6.5  | 74.6  | 100.0 |
| vietmed_027_a      | News  | S00-T88 | Host | F    | SW   | 29    | 710    | 70.8 | 20.8 | 8.3  | 6.2  | 35.4  | 100.0 |
| vietmed_027_b      |       |         | Brc. | M    | SE   | 64    | 1454   | 49.5 | 39.1 | 11.3 | 5.6  | 56.1  | 100.0 |
| vietmed_028_a      |       | V00-Y99 | Host | F    | SE   | 106   | 2617   | 52.7 | 34.7 | 12.6 | 4.1  | 51.5  | 100.0 |
| vietmed_028_b      |       |         | Brc. | M    | SE   | 21    | 475    | 47.6 | 41.5 | 10.9 | 6.7  | 59.2  | 100.0 |
| vietmed_029        |       |         | Brc. | F    | SE   | 92    | 2240   | 60.4 | 30.0 | 9.6  | 5.4  | 45.1  | 100.0 |
| Sum/Avg            |       |         |      |      |      | 3437  | 76136  | 54.2 | 33.5 | 12.3 | 6.0  | 51.8  | 99.9  |
| Mean               |       |         |      |      |      | 127.3 | 2819.9 | 53.0 | 33.2 | 13.8 | 6.4  | 53.3  | 100.0 |
| Standard Deviation |       |         |      |      |      | 129.6 | 2743.3 | 11.4 | 8.0  | 5.2  | 3.1  | 12.1  | 0.1   |
| Median             |       |         |      |      |      | 86.0  | 1838.0 | 55.3 | 31.9 | 12.8 | 5.6  | 51.5  | 100.0 |

Table 10: Analysis of ASR errors on *VietMed-Test* set using the baseline model *XLSP-53* (WER = 51.8). Column from left to right is: Speaker ID, Recording Condition, ICD-10 Code, Speaker Role, Gender, Accent, Number of sentences, Number of words, Corrections, Substitution Errors, Deletion Errors, Insertion Errors, Word-Error-Rate, Sentence-Error-Rate.

For Recording Condition, there are: Telephone (Tel.), Talkshow (Talk.), Podcast (Pod.), Diagnosis (Diag.), Lectures (Lec.), News.

For Speaker Role, there are: Lecturer (Lec.), Doctor (Doc.), Talkshow Host (Host), Patient (Pat.), Podcaster (Pod.), Broadcaster (Brc.).

For Gender, there are: Male (M) and Female (F).

For Accent, there are: South Central Coast (SCC), North (N), Southwest (SW), Southeast (SE), North Central Coast (NCC).

| Speaker ID         | Rec.  | ICD-10  | Role | Gend | Acc. | # Snt | # Wrđ  | Corr | Sub  | Del  | Ins  | Err  | S.Err |
|--------------------|-------|---------|------|------|------|-------|--------|------|------|------|------|------|-------|
| vietmed_002        | Tel.  | N00-N99 | Lec. | F    | SCC  | 363   | 7631   | 33.8 | 50.7 | 15.5 | 5.6  | 71.8 | 100.0 |
| vietmed_004        |       | M00-M99 | Doc. | M    | SCC  | 446   | 10575  | 52.1 | 34.1 | 13.8 | 6.5  | 54.3 | 100.0 |
| vietmed_014_a      |       | K00-K95 | Host | F    | N    | 18    | 491    | 72.3 | 15.9 | 11.8 | 5.1  | 32.8 | 100.0 |
| vietmed_014_b      |       |         | Doc. | M    | N    | 164   | 4034   | 57.8 | 28.6 | 13.6 | 4.6  | 46.8 | 100.0 |
| vietmed_015_a      |       | O00-O9A | Host | F    | N    | 73    | 1779   | 70.8 | 18.1 | 11.1 | 4.5  | 33.7 | 100.0 |
| vietmed_015_b      |       |         | Doc. | F    | N    | 297   | 5669   | 60.1 | 26.7 | 13.2 | 4.7  | 44.6 | 99.7  |
| vietmed_015_c      |       |         | Pat. | F    | N    | 55    | 1010   | 44.4 | 37.5 | 18.1 | 5.4  | 61.1 | 100.0 |
| vietmed_017_a      | Talk. | U00-U85 | Doc. | F    | SW   | 47    | 1104   | 51.6 | 36.2 | 12.1 | 6.3  | 54.6 | 100.0 |
| vietmed_017_b      |       |         | Doc. | M    | N    | 86    | 2061   | 62.4 | 26.7 | 10.9 | 4.9  | 42.4 | 100.0 |
| vietmed_018_a      |       | K00-K95 | Host | F    | SW   | 63    | 1527   | 59.2 | 27.5 | 13.3 | 19.6 | 60.4 | 100.0 |
| vietmed_018_b      |       |         | Doc. | M    | SW   | 192   | 5293   | 59.5 | 26.3 | 14.3 | 6.7  | 47.2 | 100.0 |
| vietmed_018_c      |       |         | Doc. | F    | SW   | 118   | 2761   | 57.7 | 29.6 | 12.7 | 9.0  | 51.4 | 100.0 |
| vietmed_018_d      |       |         | Pat. | F    | SW   | 20    | 412    | 34.7 | 34.5 | 30.8 | 4.9  | 70.1 | 100.0 |
| vietmed_018_e      |       |         | Pat. | M    | SW   | 5     | 76     | 42.1 | 34.2 | 23.7 | 7.9  | 65.8 | 100.0 |
| vietmed_018_f      |       |         | Doc. | M    | SW   | 25    | 639    | 44.0 | 38.2 | 17.8 | 7.0  | 63.1 | 100.0 |
| vietmed_019_a      |       | L00-L99 | Host | F    | SW   | 58    | 1490   | 58.6 | 28.7 | 12.7 | 6.8  | 48.2 | 100.0 |
| vietmed_019_b      |       |         | Doc. | F    | SW   | 116   | 2776   | 58.9 | 28.4 | 12.7 | 7.4  | 48.5 | 100.0 |
| vietmed_023        | Pod.  | P00-P96 | Pod. | F    | SW   | 390   | 7414   | 63.0 | 29.6 | 7.4  | 4.8  | 41.8 | 99.7  |
| vietmed_024        |       | O00_O99 | Pod. | F    | SE   | 376   | 7425   | 65.4 | 25.9 | 8.6  | 5.8  | 40.3 | 99.5  |
| vietmed_025_a      | Diag. | H60-H95 | Host | F    | SW   | 101   | 2280   | 65.3 | 24.5 | 10.2 | 4.6  | 39.3 | 100.0 |
| vietmed_025_b      |       |         | Doc. | M    | SE   | 91    | 1838   | 67.2 | 23.2 | 9.5  | 7.1  | 39.8 | 100.0 |
| vietmed_026        | Lec.  | A00-B99 | Lec. | M    | NCC  | 21    | 355    | 26.5 | 47.3 | 26.2 | 4.8  | 78.3 | 100.0 |
| vietmed_027_a      | News  | S00-T88 | Host | F    | SW   | 29    | 710    | 68.7 | 22.5 | 8.7  | 5.5  | 36.8 | 100.0 |
| vietmed_027_b      |       |         | Brc. | M    | SE   | 64    | 1454   | 41.5 | 44.6 | 13.9 | 5.2  | 63.7 | 100.0 |
| vietmed_028_a      |       | V00-Y99 | Host | F    | SE   | 106   | 2617   | 59.7 | 28.8 | 11.5 | 4.4  | 44.7 | 99.1  |
| vietmed_028_b      |       |         | Brc. | M    | SE   | 21    | 475    | 48.8 | 39.2 | 12.0 | 5.1  | 56.2 | 100.0 |
| vietmed_029        |       |         | Brc. | F    | SE   | 92    | 2240   | 64.4 | 26.1 | 9.6  | 5.9  | 41.6 | 100.0 |
| Sum/Avg            |       |         |      |      |      | 3437  | 76136  | 56.5 | 31.2 | 12.3 | 6.0  | 49.5 | 99.9  |
| Mean               |       |         |      |      |      | 127.3 | 2819.9 | 55.2 | 30.9 | 13.9 | 6.3  | 51.1 | 99.9  |
| Standard Deviation |       |         |      |      |      | 129.6 | 2743.3 | 12.0 | 8.3  | 5.4  | 2.9  | 12.2 | 0.2   |
| Median             |       |         |      |      |      | 86.0  | 1838.0 | 58.9 | 28.7 | 12.7 | 5.5  | 48.2 | 100.0 |

Table 11: Analysis of ASR errors on *VietMed-Test* set using the baseline model *w2v2-Viet* (WER = 49.5). Column from left to right is: Speaker ID, Recording Condition, ICD-10 Code, Speaker Role, Gender, Accent, Number of sentences, Number of words, Corrections, Substitution Errors, Deletion Errors, Insertion Errors, Word-Error-Rate, Sentence-Error-Rate.

For Recording Condition, there are: Telephone (Tel.), Talkshow (Talk.), Podcast (Pod.), Diagnosis (Diag.), Lectures (Lec.), News.

For Speaker Role, there are: Lecturer (Lec.), Doctor (Doc.), Talkshow Host (Host), Patient (Pat.), Podcaster (Pod.), Broadcaster (Brc.).

For Gender, there are: Male (M) and Female (F).

For Accent, there are: South Central Coast (SCC), North (N), Southwest (SW), Southeast (SE), North Central Coast (NCC).

| Speaker ID         | Rec.  | ICD-10  | Role | Gend | Acc. | # Snt | # Wrđ  | Corr | Sub  | Del  | Ins  | Err  | S.Err |
|--------------------|-------|---------|------|------|------|-------|--------|------|------|------|------|------|-------|
| vietmed_002        | Tel.  | N00-N99 | Lec. | F    | SCC  | 363   | 7631   | 57.8 | 31.2 | 11.0 | 6.3  | 48.5 | 100.0 |
| vietmed_004        |       | M00-M99 | Doc. | M    | SCC  | 446   | 10575  | 68.8 | 18.7 | 12.5 | 5.4  | 36.6 | 100.0 |
| vietmed_014_a      |       | K00-K95 | Host | F    | N    | 18    | 491    | 87.8 | 3.5  | 8.8  | 4.7  | 16.9 | 100.0 |
| vietmed_014_b      |       |         | Doc. | M    | N    | 164   | 4034   | 77.2 | 12.2 | 10.5 | 4.6  | 27.4 | 100.0 |
| vietmed_015_a      |       | O00-O9A | Host | F    | N    | 73    | 1779   | 85.2 | 5.8  | 9.0  | 3.6  | 18.4 | 97.3  |
| vietmed_015_b      |       |         | Doc. | F    | N    | 297   | 5669   | 82.4 | 7.7  | 9.8  | 4.2  | 21.8 | 97.3  |
| vietmed_015_c      |       |         | Pat. | F    | N    | 55    | 1010   | 70.1 | 14.9 | 15.0 | 5.8  | 35.7 | 100.0 |
| vietmed_017_a      | Talk. | U00-U85 | Doc. | F    | SW   | 47    | 1104   | 76.6 | 13.1 | 10.2 | 4.2  | 27.5 | 100.0 |
| vietmed_017_b      |       |         | Doc. | M    | N    | 86    | 2061   | 80.1 | 10.4 | 9.6  | 4.8  | 24.7 | 100.0 |
| vietmed_018_a      |       | K00-K95 | Host | F    | SW   | 63    | 1527   | 73.7 | 13.2 | 13.2 | 18.7 | 45.1 | 100.0 |
| vietmed_018_b      |       |         | Doc. | M    | SW   | 192   | 5293   | 75.3 | 12.1 | 12.6 | 6.5  | 31.2 | 100.0 |
| vietmed_018_c      |       |         | Doc. | F    | SW   | 118   | 2761   | 74.3 | 12.4 | 13.3 | 7.3  | 33.0 | 100.0 |
| vietmed_018_d      |       |         | Pat. | F    | SW   | 20    | 412    | 55.1 | 20.6 | 24.3 | 5.6  | 50.5 | 100.0 |
| vietmed_018_e      |       |         | Pat. | M    | SW   | 5     | 76     | 57.9 | 19.7 | 22.4 | 7.9  | 50.0 | 100.0 |
| vietmed_018_f      |       |         | Doc. | M    | SW   | 25    | 639    | 64.9 | 20.3 | 14.7 | 6.1  | 41.2 | 100.0 |
| vietmed_019_a      |       | L00-L99 | Host | F    | SW   | 58    | 1490   | 75.2 | 12.6 | 12.2 | 6.7  | 31.5 | 100.0 |
| vietmed_019_b      |       |         | Doc. | F    | SW   | 116   | 2776   | 75.7 | 11.9 | 12.5 | 6.2  | 30.5 | 100.0 |
| vietmed_023        | Pod.  | P00-P96 | Pod. | F    | SW   | 390   | 7414   | 83.3 | 10.6 | 6.0  | 4.1  | 20.8 | 97.4  |
| vietmed_024        |       | O00_O99 | Pod. | F    | SE   | 376   | 7425   | 85.0 | 8.0  | 7.1  | 5.0  | 20.1 | 98.4  |
| vietmed_025_a      | Diag. | H60-H95 | Host | F    | SW   | 101   | 2280   | 80.4 | 10.6 | 9.0  | 4.8  | 24.4 | 100.0 |
| vietmed_025_b      |       |         | Doc. | M    | SE   | 91    | 1838   | 81.8 | 10.0 | 8.3  | 5.1  | 23.3 | 98.9  |
| vietmed_026        | Lec.  | A00-B99 | Lec. | M    | NCC  | 21    | 355    | 57.7 | 27.9 | 14.4 | 7.3  | 49.6 | 100.0 |
| vietmed_027_a      | News  | S00-T88 | Host | F    | SW   | 29    | 710    | 83.5 | 8.0  | 8.5  | 4.6  | 21.1 | 100.0 |
| vietmed_027_b      |       |         | Brc. | M    | SE   | 64    | 1454   | 74.8 | 15.8 | 9.4  | 5.2  | 30.4 | 100.0 |
| vietmed_028_a      |       | V00-Y99 | Host | F    | SE   | 106   | 2617   | 82.7 | 8.8  | 8.6  | 4.2  | 21.6 | 99.1  |
| vietmed_028_b      |       |         | Brc. | M    | SE   | 21    | 475    | 74.3 | 14.9 | 10.7 | 5.3  | 30.9 | 100.0 |
| vietmed_029        |       |         | Brc. | F    | SE   | 92    | 2240   | 83.9 | 7.5  | 8.5  | 5.6  | 21.7 | 97.8  |
| Sum/Avg            |       |         |      |      |      | 3437  | 76136  | 75.9 | 13.8 | 10.3 | 5.6  | 29.6 | 99.1  |
| Mean               |       |         |      |      |      | 127.3 | 2819.9 | 75.0 | 13.4 | 11.6 | 5.9  | 30.9 | 99.5  |
| Standard Deviation |       |         |      |      |      | 129.6 | 2743.3 | 9.3  | 6.4  | 4.1  | 2.8  | 10.5 | 1.0   |
| Median             |       |         |      |      |      | 86.0  | 1838.0 | 75.7 | 12.2 | 10.5 | 5.3  | 30.4 | 100.0 |

Table 12: Analysis of ASR errors on *VietMed-Test* set using the best baseline model *XLSR-53-Viet* (WER = 29.6).

Column from left to right is: Speaker ID, Recording Condition, ICD-10 Code, Speaker Role, Gender, Accent, Number of sentences, Number of words, Corrections, Substitution Errors, Deletion Errors, Insertion Errors, Word-Error-Rate, Sentence-Error-Rate.

For Recording Condition, there are: Telephone (Tel.), Talkshow (Talk.), Podcast (Pod.), Diagnosis (Diag.), Lectures (Lec.), News.

For Speaker Role, there are: Lecturer (Lec.), Doctor (Doc.), Talkshow Host (Host), Patient (Pat.), Podcaster (Pod.), Broadcaster (Brc.).

For Gender, there are: Male (M) and Female (F).

For Accent, there are: South Central Coast (SCC), North (N), Southwest (SW), Southeast (SE), North Central Coast (NCC).



| Index | Occurrences | Confusion pair       | Type |
|-------|-------------|----------------------|------|
| 1     | 75          | bé $\Rightarrow$ b   | Med  |

Table 13 continued from previous page

| Index | Occurrences | Confusion pair                         | Type |
|-------|-------------|----------------------------------------|------|
| 2     | 75          | cung $\Rightarrow$ công                | -    |
| 3     | 49          | các $\Rightarrow$ cái                  | -    |
| 4     | 34          | trẻ $\Rightarrow$ sẽ                   | Med  |
| 5     | 33          | bú $\Rightarrow$ bốn                   | Med  |
| 6     | 31          | implant $\Rightarrow$ lên              | Med  |
| 7     | 30          | thai $\Rightarrow$ hai                 | Med  |
| 8     | 28          | cái $\Rightarrow$ các                  | Fill |
| 9     | 26          | là $\Rightarrow$ mà                    | Fill |
| 10    | 25          | tử $\Rightarrow$ bệnh                  | Med  |
| 11    | 25          | vì $\Rightarrow$ thì                   | Fill |
| 12    | 24          | răng $\Rightarrow$ đang                | Med  |
| 13    | 23          | cấy $\Rightarrow$ cái                  | Med  |
| 14    | 23          | làm $\Rightarrow$ là                   | -    |
| 15    | 21          | là $\Rightarrow$ và                    | Fill |
| 16    | 20          | đó $\Rightarrow$ nó                    | Fill |
| 17    | 19          | và $\Rightarrow$ là                    | Fill |
| 18    | 19          | và $\Rightarrow$ mà                    | Fill |
| 19    | 19          | âm $\Rightarrow$ ăn                    | Med  |
| 20    | 18          | là $\Rightarrow$ làm                   | Fill |
| 21    | 18          | mình $\Rightarrow$ mà                  | Fill |
| 22    | 18          | trồng $\Rightarrow$ trong              | Med  |
| 23    | 17          | bú $\Rightarrow$ bố                    | Med  |
| 24    | 17          | chị $\Rightarrow$ chỉ                  | -    |
| 25    | 17          | có $\Rightarrow$ cái                   | -    |
| 26    | 17          | là $\Rightarrow$ lại                   | Fill |
| 27    | 17          | mà $\Rightarrow$ và                    | Fill |
| 28    | 17          | sẽ $\Rightarrow$ phải                  | Fill |
| 29    | 17          | đi $\Rightarrow$ đây                   | Fill |
| 30    | 16          | nó $\Rightarrow$ đó                    | Fill |
| 31    | 16          | tử $\Rightarrow$ về                    | Med  |
| 32    | 15          | con $\Rightarrow$ còn                  | Med  |
| 33    | 15          | progesterone $\Rightarrow$ cholesterol | Med  |
| 34    | 15          | rong $\Rightarrow$ năm                 | Med  |
| 35    | 15          | thủ $\Rightarrow$ phẫu                 | Med  |
| 36    | 14          | implant $\Rightarrow$ selen            | Med  |
| 37    | 14          | que $\Rightarrow$ quen                 | Med  |
| 38    | 13          | còn $\Rightarrow$ có                   | Fill |
| 39    | 13          | có $\Rightarrow$ các                   | Fill |
| 40    | 13          | có $\Rightarrow$ đó                    | Fill |
| 41    | 13          | lại $\Rightarrow$ là                   | Fill |
| 42    | 12          | như $\Rightarrow$ nhưng                | Fill |
| 43    | 11          | bà $\Rightarrow$ mà                    | -    |
| 44    | 11          | bình $\Rightarrow$ bệnh                | Med  |
| 45    | 11          | cung $\Rightarrow$ trong               | Med  |
| 46    | 11          | là $\Rightarrow$ nó                    | Fill |
| 47    | 11          | mình $\Rightarrow$ bệnh                | -    |
| 48    | 11          | răng $\Rightarrow$ gan                 | Med  |
| 49    | 11          | răng $\Rightarrow$ ăn                  | Med  |
| 50    | 11          | vào $\Rightarrow$ và                   | -    |
| 51    | 10          | anh $\Rightarrow$ ăn                   | -    |
| 52    | 10          | bà $\Rightarrow$ ba                    | -    |
| 53    | 10          | chú $\Rightarrow$ chúng                | -    |
| 54    | 10          | cách $\Rightarrow$ các                 | -    |
| 55    | 10          | cô $\Rightarrow$ của                   | -    |

Table 13 continued from previous page

| Index | Occurrences | Confusion pair               | Type |
|-------|-------------|------------------------------|------|
| 56    | 10          | da $\Rightarrow$ ra          | Med  |
| 57    | 10          | khi $\Rightarrow$ thì        | -    |
| 58    | 10          | lạ $\Rightarrow$ là          | -    |
| 59    | 10          | tóc $\Rightarrow$ tác        | Med  |
| 60    | 10          | vòng $\Rightarrow$ phòng     | -    |
| 61    | 10          | đo $\Rightarrow$ đó          | Med  |
| 62    | 10          | đại $\Rightarrow$ tại        | -    |
| 63    | 9           | cổ $\Rightarrow$ của         | Med  |
| 64    | 9           | dặm $\Rightarrow$ giảm       | Med  |
| 65    | 9           | hay $\Rightarrow$ hai        | -    |
| 66    | 9           | ngựa $\Rightarrow$ là        | Med  |
| 67    | 9           | nói $\Rightarrow$ nó         | -    |
| 68    | 9           | răng $\Rightarrow$ răng      | Med  |
| 69    | 9           | sau $\Rightarrow$ sao        | -    |
| 70    | 9           | tai $\Rightarrow$ tay        | Med  |
| 71    | 9           | thì $\Rightarrow$ cái        | Fill |
| 72    | 9           | tràng $\Rightarrow$ trạm     | Med  |
| 73    | 9           | tóc $\Rightarrow$ tắt        | Med  |
| 74    | 9           | ốc $\Rightarrow$ cái         | Med  |
| 75    | 8           | chị $\Rightarrow$ thì        | -    |
| 76    | 8           | cong $\Rightarrow$ công      | Med  |
| 77    | 8           | em $\Rightarrow$ xem         | -    |
| 78    | 8           | estrogen $\Rightarrow$ selen | Med  |
| 79    | 8           | kinh $\Rightarrow$ cân       | Med  |
| 80    | 8           | nhi $\Rightarrow$ như        | Med  |
| 81    | 8           | nè $\Rightarrow$ này         | Fill |
| 82    | 8           | quy $\Rightarrow$ quá        | Med  |
| 83    | 8           | ruột $\Rightarrow$ rồi       | Med  |
| 84    | 8           | răng $\Rightarrow$ năng      | Med  |
| 85    | 8           | tai $\Rightarrow$ ta         | Med  |
| 86    | 8           | thật $\Rightarrow$ thực      | -    |
| 87    | 8           | thể $\Rightarrow$ thể        | Med  |
| 88    | 8           | trồng $\Rightarrow$ chọn     | Med  |
| 89    | 8           | tóc $\Rightarrow$ tốt        | Med  |
| 90    | 8           | tự $\Rightarrow$ từ          | Med  |
| 91    | 8           | và $\Rightarrow$ vào         | Fill |
| 92    | 8           | để $\Rightarrow$ đến         | Fill |
| 93    | 7           | an $\Rightarrow$ ăn          | -    |
| 94    | 7           | bạn $\Rightarrow$ bệnh       | -    |
| 95    | 7           | canxi $\Rightarrow$ xây      | Med  |
| 96    | 7           | cho $\Rightarrow$ cái        | -    |
| 97    | 7           | cái $\Rightarrow$ có         | Fill |
| 98    | 7           | có $\Rightarrow$ tốt         | Fill |
| 99    | 7           | cơn $\Rightarrow$ cân        | Med  |
| 100   | 7           | dày $\Rightarrow$ dài        | Med  |
| 101   | 7           | ghép $\Rightarrow$ kết       | Med  |
| 102   | 7           | già $\Rightarrow$ ra         | Med  |
| 103   | 7           | kinh $\Rightarrow$ đến       | Med  |
| 104   | 7           | kỹ $\Rightarrow$ cái         | -    |
| 105   | 7           | là $\Rightarrow$ ta          | Fill |
| 106   | 7           | nữ $\Rightarrow$ nữa         | -    |
| 107   | 7           | qua $\Rightarrow$ quá        | -    |
| 108   | 7           | siêu $\Rightarrow$ thức      | Med  |
| 109   | 7           | thì $\Rightarrow$ vì         | Fill |

Table 13 continued from previous page

| Index | Occurrences | Confusion pair            | Type |
|-------|-------------|---------------------------|------|
| 110   | 7           | thì $\Rightarrow$ để      | Fill |
| 111   | 7           | tử $\Rightarrow$ thành    | Med  |
| 112   | 7           | vậy $\Rightarrow$ mà      | Fill |
| 113   | 7           | vắcxin $\Rightarrow$ sĩ   | Med  |
| 114   | 7           | âm $\Rightarrow$ tâm      | Med  |
| 115   | 7           | đó $\Rightarrow$ nữa      | Fill |
| 116   | 7           | để $\Rightarrow$ cái      | Fill |
| 117   | 6           | buông $\Rightarrow$ buồn  | Med  |
| 118   | 6           | bà $\Rightarrow$ và       | -    |
| 119   | 6           | cho $\Rightarrow$ chất    | -    |
| 120   | 6           | cho $\Rightarrow$ ra      | -    |
| 121   | 6           | con $\Rightarrow$ có      | Med  |
| 122   | 6           | cung $\Rightarrow$ không  | Med  |
| 123   | 6           | cách $\Rightarrow$ cái    | -    |
| 124   | 6           | cái $\Rightarrow$ với     | Fill |
| 125   | 6           | có $\Rightarrow$ của      | Fill |
| 126   | 6           | có $\Rightarrow$ nó       | -    |
| 127   | 6           | cây $\Rightarrow$ thấy    | Med  |
| 128   | 6           | của $\Rightarrow$ có      | -    |
| 129   | 6           | d $\Rightarrow$ b         | -    |
| 130   | 6           | dịch $\Rightarrow$ việc   | Med  |
| 131   | 6           | f0 $\Rightarrow$ không    | Med  |
| 132   | 6           | ghép $\Rightarrow$ biết   | Med  |
| 133   | 6           | hợp $\Rightarrow$ hai     | -    |
| 134   | 6           | khiếm $\Rightarrow$ khiến | -    |
| 135   | 6           | khá $\Rightarrow$ khác    | -    |
| 136   | 6           | lý $\Rightarrow$ lấy      | -    |
| 137   | 6           | lạ $\Rightarrow$ lại      | -    |
| 138   | 6           | mãn $\Rightarrow$ mạn     | Med  |
| 139   | 6           | ngày $\Rightarrow$ này    | -    |
| 140   | 6           | nhỏ $\Rightarrow$ nhỏ     | Med  |
| 141   | 6           | nín $\Rightarrow$ đến     | Med  |
| 142   | 6           | nó $\Rightarrow$ là       | Fill |
| 143   | 6           | phải $\Rightarrow$ cái    | -    |
| 144   | 6           | ra $\Rightarrow$ da       | -    |
| 145   | 6           | rong $\Rightarrow$ tâm    | Med  |
| 146   | 6           | sợ $\Rightarrow$ sở       | -    |
| 147   | 6           | sữa $\Rightarrow$ sự      | Med  |
| 148   | 6           | thì $\Rightarrow$ bị      | Fill |
| 149   | 6           | thì $\Rightarrow$ chúng   | Fill |
| 150   | 6           | thì $\Rightarrow$ thể     | Fill |
| 151   | 6           | thú $\Rightarrow$ thuốc   | Med  |
| 152   | 6           | thấy $\Rightarrow$ cái    | -    |
| 153   | 6           | thể $\Rightarrow$ sẽ      | Med  |
| 154   | 6           | trẻ $\Rightarrow$ kể      | Med  |
| 155   | 6           | trẻ $\Rightarrow$ để      | Med  |
| 156   | 6           | trồng $\Rightarrow$ viêm  | Med  |
| 157   | 6           | u $\Rightarrow$ ung       | Med  |
| 158   | 6           | viện $\Rightarrow$ vị     | Med  |
| 159   | 6           | với $\Rightarrow$ cái     | Fill |
| 160   | 6           | xơ $\Rightarrow$ thư      | Med  |
| 161   | 6           | âm $\Rightarrow$ vitamin  | Med  |
| 162   | 6           | đo $\Rightarrow$ đau      | Med  |

Table 13 continued from previous page

| Index | Occurrences | Confusion pair              | Type |
|-------|-------------|-----------------------------|------|
| 163   | 6           | đây $\Rightarrow$ này       | Fill |
| 164   | 6           | đầy $\Rightarrow$ đây       | Fill |
| 165   | 6           | đầu $\Rightarrow$ đau       | Med  |
| 166   | 6           | đầy $\Rightarrow$ đây       | -    |
| 167   | 6           | đủ $\Rightarrow$ đúng       | -    |
| 168   | 5           | cho $\Rightarrow$ cao       | -    |
| 169   | 5           | cho $\Rightarrow$ trong     | -    |
| 170   | 5           | chân $\Rightarrow$ nhân     | Med  |
| 171   | 5           | chín $\Rightarrow$ chính    | Med  |
| 172   | 5           | chỉ $\Rightarrow$ cái       | -    |
| 173   | 5           | covid19 $\Rightarrow$ chính | Med  |
| 174   | 5           | còn $\Rightarrow$ và        | -    |
| 175   | 5           | có $\Rightarrow$ bác        | Fill |
| 176   | 5           | có $\Rightarrow$ là         | Fill |
| 177   | 5           | do $\Rightarrow$ ra         | -    |
| 178   | 5           | dạng $\Rightarrow$ giảm     | -    |
| 179   | 5           | dự $\Rightarrow$ nhiều      | -    |
| 180   | 5           | gây $\Rightarrow$ cái       | -    |
| 181   | 5           | hoặc $\Rightarrow$ họ       | -    |
| 182   | 5           | hư $\Rightarrow$ hơn        | Med  |
| 183   | 5           | không $\Rightarrow$ trong   | -    |
| 184   | 5           | khỏe $\Rightarrow$ khoẻ     | Med  |
| 185   | 5           | kính $\Rightarrow$ cái      | Med  |
| 186   | 5           | kết $\Rightarrow$ cái       | Med  |
| 187   | 5           | là $\Rightarrow$ người      | Fill |
| 188   | 5           | là $\Rightarrow$ này        | Fill |
| 189   | 5           | là $\Rightarrow$ đã         | Fill |
| 190   | 5           | mà $\Rightarrow$ là         | Fill |
| 191   | 5           | mái $\Rightarrow$ máy       | Med  |
| 192   | 5           | mất $\Rightarrow$ mức       | -    |
| 193   | 5           | mặt $\Rightarrow$ mạch      | Med  |
| 194   | 5           | nang $\Rightarrow$ năng     | -    |
| 195   | 5           | nhân $\Rightarrow$ nhấn     | Med  |
| 196   | 5           | nhũ $\Rightarrow$ nhiều     | Med  |
| 197   | 5           | này $\Rightarrow$ ngày      | Fill |
| 198   | 5           | nó $\Rightarrow$ cái        | Fill |
| 199   | 5           | nó $\Rightarrow$ có         | Fill |
| 200   | 5           | nền $\Rightarrow$ nên       | Med  |
| 201   | 5           | phụ $\Rightarrow$ phẫu      | Med  |
| 202   | 5           | que $\Rightarrow$ quá       | Med  |
| 203   | 5           | quên $\Rightarrow$ khuyên   | -    |
| 204   | 5           | răng $\Rightarrow$ căn      | Med  |
| 205   | 5           | sao $\Rightarrow$ ra        | -    |
| 206   | 5           | sâu $\Rightarrow$ sau       | Med  |
| 207   | 5           | sẽ $\Rightarrow$ sĩ         | -    |
| 208   | 5           | sức $\Rightarrow$ rất       | Med  |
| 209   | 5           | thanh $\Rightarrow$ thành   | Med  |
| 210   | 5           | thuyền $\Rightarrow$ nguyên | Med  |
| 211   | 5           | thì $\Rightarrow$ người     | Fill |
| 212   | 5           | thì $\Rightarrow$ này       | Fill |
| 213   | 5           | thính $\Rightarrow$ tính    | Med  |
| 214   | 5           | thể $\Rightarrow$ để        | Med  |
| 215   | 5           | tiêm $\Rightarrow$ tìm      | Med  |
| 216   | 5           | truyền $\Rightarrow$ trì    | Med  |

Table 13 continued from previous page

| Index | Occurrences | Confusion pair            | Type |
|-------|-------------|---------------------------|------|
| 217   | 5           | tránh $\Rightarrow$ trình | Med  |
| 218   | 5           | trên $\Rightarrow$ chân   | -    |
| 219   | 5           | trắng $\Rightarrow$ tháng | Med  |
| 220   | 5           | tức $\Rightarrow$ rất     | -    |
| 221   | 5           | tử $\Rightarrow$ công     | Med  |
| 222   | 5           | và $\Rightarrow$ giảm     | Fill |
| 223   | 5           | vàng $\Rightarrow$ vân    | -    |
| 224   | 5           | xơ $\Rightarrow$ oxy      | Med  |
| 225   | 5           | áp $\Rightarrow$ tác      | Med  |
| 226   | 5           | âm $\Rightarrow$ năm      | Med  |
| 227   | 5           | ăn $\Rightarrow$ anh      | Med  |
| 228   | 5           | đeo $\Rightarrow$ đều     | -    |
| 229   | 5           | đầu $\Rightarrow$ đau     | -    |
| 230   | 5           | đó $\Rightarrow$ đã       | -    |
| 231   | 5           | đầu $\Rightarrow$ nào     | Med  |
| 232   | 5           | để $\Rightarrow$ thì      | -    |
| 233   | 5           | để $\Rightarrow$ đáy      | -    |
| 234   | 5           | đột $\Rightarrow$ được    | -    |
| 235   | 5           | ở $\Rightarrow$ của       | -    |

Table 13: Statistics of confusion pairs in *VietMed-Test* using the best pre-trained model *XLSR-53-Viet* (WER = 29.6).

In this table, we divide into 2 types of confusion pairs: Medical (a word that is a part of a medical term) and Filler (a word that is a part of a filler in real-world conversations). Only confusion pairs that have at least 5 occurrences in the recognition of the *VietMed-Test* are included in this table.

| OOV           | Phonemes                                  | Correct |
|---------------|-------------------------------------------|---------|
| acenocoumarol | a:_2 k E_1 n o_1 k a_1 u_1 m a:_1 z O_1 n | N       |
| alo           | a:_1 l O_1                                | Y       |
| amin          | a:_1 m i_1 n                              | Y       |
| amylase       | a:_1 m i_1 l a:_1                         | N       |
| apomorphine   | a:_2 p o_1 m o_1 f i_1 n                  | Y       |
| ascorbic      | a:_1 s k O_1 b_&lt; i_2 k                 | Y       |
| aspirin       | a:_1 s p i_1 z i_1 n                      | N       |
| betacarotene  | b_&lt; E_1 t a:_2 k a:_1 z O_1 t E_1 n    | N       |
| betaglukan    | b_&lt; E_1 t a:_1 l u_1 k a:_1 n          | Y       |
| canxi         | k a:_1 n s i_1                            | Y       |
| catecholamine | k a:_2 t E_1 t s\O_1 l a:_1 m i_1 n       | N       |
| cbt           | k b_&lt; t                                | N       |
| cholesterol   | t s\O_1 l E_1 s t @:_1 O_1 n              | N       |
| clohidric     | k @:_3 l o_1 a_1 z i_2 k                  | N       |
| collagen      | k o_1 l l a:_1 z E_1 n                    | Y       |
| cologen       | k o_1 l o_1 G E_1 n                       | Y       |
| corticoid     | k O_1 t i_1 k O_1 i_1                     | Y       |
| cortisol      | k O_1 t i_1 s O_1 n                       | Y       |
| covid         | k o_1 v i_1                               | N       |
| ct            | k t                                       | N       |
| dbs           | z b_&lt;                                  | N       |
| gen           | G E_1 n                                   | Y       |
| google        | G O_1 o_1 G o_1                           | N       |
| gút           | G u_2 t                                   | Y       |
| hdl           | h d_&lt; n                                | N       |
| hemoglobin    | h E_1 m o_1 G @:_3 l O_1 b_&lt; i_1 n     | Y       |

Table 14 continued from previous page

| OOV          | Phonemes                                  | Correct |
|--------------|-------------------------------------------|---------|
| hormone      | h O_1 m O_1 n                             | Y       |
| inr          | i_1 n                                     | N       |
| insulin      | i_1 n s u_1 l i_1 n                       | Y       |
| internet     | i_1 n t @:_1 n E_2 t                      | Y       |
| iod          | i_1 o_2 t                                 | Y       |
| kcal         | k k a:_1 n                                | N       |
| kilogam      | k i_1 l o_1 G a:_1 m                      | Y       |
| laser        | l a:_1 @:_1                               | N       |
| ldl          | l d_&lt; n                                | N       |
| levodopa     | l E_1 v o_1 d_&lt; O_2 p a:_1             | Y       |
| liraglutide  | l i_1 z a:_1 l u_1 t i_1 d_&lt; E_1       | N       |
| livestream   | l a:_1 i_1 s t s l i_1 m                  | Y       |
| mc           | m k                                       | N       |
| mililit      | m i_1 l i_1 l i_2 t                       | Y       |
| milimet      | m i_1 l i_1 m E_2 t                       | Y       |
| monitor      | m O_1 n i_1 t O_1                         | Y       |
| mri          | m z i_1                                   | N       |
| multivitamin | m u_1 n t i_1 v i_1 t a:_1 m i_1 n        | Y       |
| natri        | n a:_1 t z i_1                            | N       |
| niu          | n i_1 u_1                                 | Y       |
| noark        | n O_1 a:_1 k                              | Y       |
| orlistat     | O_1 l i_2 t a:_2 t                        | N       |
| pacemaker    | p a:_2 k E_1 m a:_1 k @:_1                | N       |
| parkinson    | p a:_2 k i_1 n s O_1 n                    | N       |
| pepsin       | p E_2 p s i_1 n                           | Y       |
| phytoncide   | f i_1 t O_1 n s i_1 d_&lt; E_1            | N       |
| pp           | p p                                       | N       |
| protein      | p @:_3 z o_1 t i_1 n                      | N       |
| qr           | k                                         | N       |
| radiography  | z a:_1 d_&lt; i_1 o_1 G @:_3 z a:_1 f i_1 | N       |
| run          | z u_1 n                                   | N       |
| selen        | s E_1 l E_1 n                             | Y       |
| show         | s @_1 u_1                                 | N       |
| sulfonylurea | s u_1 l f O_1 n i_1 l u_1 i_2             | N       |
| sunfuric     | s u_1 n f u_1 i_2 k                       | N       |
| test         | t E_2 t                                   | N       |
| umami        | u_1 m a:_1 m i_1                          | Y       |
| vitamin      | v i_1 t a:_1 m i_1 n                      | Y       |
| vitamina     | v i_1 t a:_1 m i_1 n a:_1                 | Y       |
| vắcxin       | v a_2 k s i_1 n                           | Y       |
| ôliu         | o_1 l i_1 u_1                             | Y       |

Table 14: List of OOVs found in *VietMed-Train*. In this table, only loan words are included together with their corresponding phonemes (in BABEL IARPA format). Since the use of the automatic toolkit Sequitur Grapheme-To-Phoneme (Bisani and Ney, 2008), some OOVs are correctly or incorrectly mapped, which we denote as Yes (Y) or No (N).
